# Supplementary material
Source: publisher figshare collection journal article supplement (https://karger.figshare.com/ndownloader/files/31054057)
Supplement: Supplementary file 1 [file 31054057]

**Online Supplementary Material: Reclassification of diagnoses codes used in Table 1**

| **Diagnosis Codes (ICD-9 and ICD-10)** | **Diagnosis Description** | **Reclassified Diagnosis Codes** |
| --- | --- | --- |
| 38.9 | UNSPECIFIED SEPTICEMIA | Infection |
| 78.11 | CONDYLOMA ACUMINATUM | Vulvar disorder |
| 112.1 | CANDIDIASIS OF VULVA AND VAGINA | Infection |
| 153.3 | MALIGNANT NEOPLASM OF SIGMOID COLON | Malignancy |
| 153.4 | MALIGNANT NEOPLASM OF CECUM | Malignancy |
| 153.5 | MALIGNANT NEOPLASM OF APPENDIX VERMIFORMIS | Malignancy |
| 153.6 | MALIGNANT NEOPLASM OF ASCENDING COLON | Malignancy |
| 154.1 | MALIGNANT NEOPLASM OF RECTUM | Malignancy |
| 158.8 | MALIGNANT NEOPLASM OF SPECIFIED PARTS OF PERITONEUM | Malignancy |
| 171.8 | MALIGNANT NEOPLASM OF OTHER SPECIFIED SITES OF CONNECTIVE AN | Malignancy |
| 171.9 | MALIGNANT NEOPLASM OF CONNECTIVE AND OTHER SOFT TISSUE, SITE | Malignancy |
| 174.2 | MALIGNANT NEOPLASM OF UPPER-INNER QUADRANT OF FEMALE BREAST | Malignancy |
| 174.3 | MALIGNANT NEOPLASM OF LOWER-INNER QUADRANT OF FEMALE BREAST | Malignancy |
| 174.4 | MALIGNANT NEOPLASM OF UPPER-OUTER QUADRANT OF FEMALE BREAST | Malignancy |
| 174.9 | MALIGNANT NEOPLASM OF BREAST (FEMALE), UNSPECIFIED | Malignancy |
| 179 | MALIGNANT NEOPLASM OF UTERUS, PART UNSPECIFIED | Malignancy |
| 180 | MALIGNANT NEOPLASM OF ENDOCERVIX | Malignancy |
| 180.1 | MALIGNANT NEOPLASM OF EXOCERVIX | Malignancy |
| 180.8 | MALIGNANT NEOPLASM OF OTHER SPECIFIED SITES OF CERVIX | Malignancy |
| 180.9 | MALIGNANT NEOPLASM OF CERVIX UTERI, UNSPECIFIED | Malignancy |
| 182 | MALIGNANT NEOPLASM OF CORPUS UTERI, EXCEPT ISTHMUS | Malignancy |
| 183 | MALIGNANT NEOPLASM OF OVARY | Malignancy |
| 183.2 | MALIGNANT NEOPLASM OF FALLOPIAN TUBE | Malignancy |
| 183.8 | MALIGNANT NEOPLASM OF OTHER SPECIFIED SITES OF UTERINE ADNEX | Malignancy |
| 184.4 | MALIGNANT NEOPLASM OF VULVA, UNSPECIFIED | Malignancy |
| 188.9 | MALIGNANT NEOPLASM OF BLADDER, PART UNSPECIFIED | Malignancy |
| 189 | MALIGNANT NEOPLASM OF KIDNEY, EXCEPT PELVIS | Malignancy |
| 189.3 | MALIGNANT NEOPLASM OF URETHRA | Malignancy |
| 191.9 | MALIGNANT NEOPLASM OF BRAIN, UNSPECIFIED | Malignancy |
| 193 | MALIGNANT NEOPLASM OF THYROID GLAND | Malignancy |
| 195.3 | MALIGNANT NEOPLASM OF PELVIS | Malignancy |
| 197.6 | SECONDARY MALIGNANT NEOPLASM OF RETROPERITONEUM AND PERITONE | Malignancy |
| 197.8 | SECONDARY MALIGNANT NEOPLASM OF OTHER DIGESTIVE ORGANS AND S | Malignancy |
| 198.6 | SECONDARY MALIGNANT NEOPLASM OF OVARY | Malignancy |
| 198.82 | SECONDARY MALIGNANT NEOPLASM OF GENITAL ORGANS | Malignancy |
| 198.89 | SECONDARY MALIGNANT NEOPLASM OF OTHER SPECIFIED SITES | Malignancy |
| 209.69 | BENIGN CARCINOID TUMORS OF OTHER SITES | Mass |
| 211.3 | BENIGN NEOPLASM OF COLON | Mass |
| 211.8 | BENIGN NEOPLASM OF RETROPERITONEUM AND PERITONEUM | Mass |
| 214.1 | LIPOMA OF OTHER SKIN AND SUBCUTANEOUS TISSUE | Mass |
| 218 | SUBMUCOUS LEIOMYOMA OF UTERUS | Leiomyoma |
| 218.1 | INTRAMURAL LEIOMYOMA OF UTERUS | Leiomyoma |
| 218.2 | SUBSEROUS LEIOMYOMA OF UTERUS | Leiomyoma |
| 218.9 | LEIOMYOMA OF UTERUS, UNSPECIFIED | Leiomyoma |
| 219 | BENIGN NEOPLASM OF CERVIX UTERI | Mass |
| 219.1 | BENIGN NEOPLASM OF CORPUS UTERI | Mass |
| 219.9 | BENIGN NEOPLASM OF UTERUS, PART UNSPECIFIED | Mass |
| 220 | BENIGN NEOPLASM OF OVARY | Mass |
| 221.2 | BENIGN NEOPLASM OF VULVA | Mass |
| 221.8 | BENIGN NEOPLASM OF OTHER SPECIFIED SITES OF FEMALE GENITAL O | Mass |
| 227 | BENIGN NEOPLASM OF ADRENAL GLAND | Mass |
| 229.8 | BENIGN NEOPLASM OF OTHER SPECIFIED SITES | Mass |
| 233.1 | CARCINOMA IN SITU OF CERVIX UTERI | Malignancy |
| 233.2 | CARCINOMA IN SITU OF OTHER AND UNSPECIFIED PARTS OF UTERUS | Malignancy |
| 233.32 | CARCINOMA IN SITU VULVA | Malignancy |
| 236 | NEOPLASM OF UNCERTAIN BEHAVIOR OF UTERUS | Mass |
| 236.1 | NEOPLASM OF UNCERTAIN BEHAVIOR OF PLACENTA | Mass |
| 236.2 | NEOPLASM OF UNCERTAIN BEHAVIOR OF OVARY | Mass |
| 236.3 | NEOPLASM OF UNCERTAIN BEHAVIOR OF OTHER AND UNSPECIFIED FEMA | Mass |
| 238.1 | NEOPLASM OF UNCERTAIN BEHAVIOR OF CONNECTIVE AND OTHER SOFT | Mass |
| 239.5 | NEOPLASM OF UNSPECIFIED NATURE OF OTHER GENITOURINARY ORGANS | Mass |
| 256.4 | POLYCYSTIC OVARIES | Ovarian disorder |
| 276.51 | DEHYDRATION | Other |
| 278.01 | MORBID OBESITY | Other |
| 302.5 | TRANS-SEXUALISM WITH UNSPECIFIED SEXUAL HISTORY | Other |
| 338.29 | OTHER CHRONIC PAIN | Pelvic pain |
| 346.4 | MENSTRUAL MIGRAINE, WITHOUT MENTION OF INTRACTABLE MIGRAINE, | Pelvic pain |
| 354 | CARPAL TUNNEL SYNDROME | Other |
| 427.89 | OTHER SPECIFIED CARDIAC DYSRHYTHMIAS | Other |
| 434.91 | UNSPECIFIED CEREBRAL ARTERY OCCLUSION WITH CEREBRAL INFARCTI | Other |
| 453.2 | OTHER VENOUS EMBOLISM AND THROMBOSIS OF INFERIOR VENA CAVA | Other |
| 530.81 | ESOPHAGEAL REFLUX | Other |
| 537 | ACQUIRED HYPERTROPHIC PYLORIC STENOSIS | Other |
| 539.09 | OTHER COMPLICATIONS OF GASTRIC BAND PROCEDURE | Other |
| 553.1 | UMBILICAL HERNIA WITHOUT MENTION OF OBSTRUCTION OR GANGRENE | Other |
| 553.21 | INCISIONAL HERNIA WITHOUT MENTION OF OBSTRUCTION OR GANGRENE | Other |
| 555 | REGIONAL ENTERITIS OF SMALL INTESTINE | Other |
| 555.2 | REGIONAL ENTERITIS OF SMALL INTESTINE WITH LARGE INTESTINE | Other |
| 560 | INTUSSUSCEPTION | Other |
| 560.81 | INTESTINAL OR PERITONEAL ADHESIONS WITH OBSTRUCTION (POSTOPE | Anatomic anomaly |
| 562.11 | DIVERTICULITIS OF COLON (WITHOUT MENTION OF HEMORRHAGE) | Infection |
| 567.89 | OTHER SPECIFIED PERITONITIS | Infection |
| 568 | PERITONEAL ADHESIONS (POSTOPERATIVE) (POSTINFECTION) | Anatomic anomaly |
| 568.89 | OTHER SPECIFIED DISORDERS OF PERITONEUM | Other |
| 569.81 | FISTULA OF INTESTINE, EXCLUDING RECTUM AND ANUS | Anatomic anomaly |
| 574.1 | CALCULUS OF GALLBLADDER WITH OTHER CHOLECYSTITIS, WITHOUT ME | Other |
| 575.6 | CHOLESTEROLOSIS OF GALLBLADDER | Other |
| 596.59 | OTHER FUNCTIONAL DISORDER OF BLADDER | Bladder disorder |
| 596.89 | OTHER SPECIFIED DISORDERS OF BLADDER | Bladder disorder |
| 599.5 | PROLAPSED URETHRAL MUCOSA | Prolapse |
| 599.82 | INTRINSIC (URETHRAL) SPHINCTER DEFICIENCY (ISD) | Bladder disorder |
| 611.1 | HYPERTROPHY OF BREAST | Other |
| 611.81 | PTOSIS OF BREAST | Other |
| 614.1 | CHRONIC SALPINGITIS AND OOPHORITIS | Infection |
| 614.2 | SALPINGITIS AND OOPHORITIS NOT SPECIFIED AS ACUTE, SUBACUTE, | Infection |
| 614.6 | PELVIC PERITONEAL ADHESIONS, FEMALE (POSTOPERATIVE) (POSTINF | Anatomic anomaly |
| 615.1 | CHRONIC INFLAMMATORY DISEASES OF UTERUS, EXCEPT CERVIX | Uterine disorder |
| 615.9 | UNSPECIFIED INFLAMMATORY DISEASE OF UTERUS | Uterine disorder |
| 616 | CERVICITIS AND ENDOCERVICITIS | Infection |
| 616.2 | CYST OF BARTHOLIN'S GLAND | Mass |
| 616.5 | ULCERATION OF VULVA, UNSPECIFIED | Vulvar disorder |
| 617 | ENDOMETRIOSIS OF UTERUS | Endometriosis |
| 617.1 | ENDOMETRIOSIS OF OVARY | Endometriosis |
| 617.2 | ENDOMETRIOSIS OF FALLOPIAN TUBE | Endometriosis |
| 617.3 | ENDOMETRIOSIS OF PELVIC PERITONEUM | Endometriosis |
| 617.4 | ENDOMETRIOSIS OF RECTOVAGINAL SEPTUM AND VAGINA | Endometriosis |
| 617.5 | ENDOMETRIOSIS OF INTESTINE | Endometriosis |
| 617.8 | ENDOMETRIOSIS OF OTHER SPECIFIED SITES | Endometriosis |
| 617.9 | ENDOMETRIOSIS, SITE UNSPECIFIED | Endometriosis |
| 618.01 | MIDLINE CYSTOCELE UNSPECIFIED | Prolapse |
| 618.04 | RECTOCELE | Prolapse |
| 618.1 | UTERINE PROLAPSE WITHOUT MENTION OF VAGINAL WALL PROLAPSE | Prolapse |
| 618.2 | UTEROVAGINAL PROLAPSE, INCOMPLETE | Prolapse |
| 618.3 | UTEROVAGINAL PROLAPSE, COMPLETE | Prolapse |
| 618.4 | UTEROVAGINAL PROLAPSE, UNSPECIFIED | Prolapse |
| 618.5 | PROLAPSE OF VAGINAL VAULT AFTER HYSTERECTOMY | Prolapse |
| 618.89 | OTHER SPECIFIED GENITAL PROLAPSE | Prolapse |
| 618.9 | UNSPECIFIED GENITAL PROLAPSE | Prolapse |
| 619.1 | DIGESTIVE-GENITAL TRACT FISTULA, FEMALE | Anatomic anomaly |
| 620 | FOLLICULAR CYST OF OVARY | Mass |
| 620.1 | CORPUS LUTEUM CYST OR HEMATOMA | Mass |
| 620.2 | OTHER AND UNSPECIFIED OVARIAN CYST | Mass |
| 620.8 | OTHER NONINFLAMMATORY DISORDERS OF OVARY, FALLOPIAN TUBE, AN | Ovarian disorder |
| 620.9 | UNSPECIFIED NONINFLAMMATORY DISORDER OF OVARY, FALLOPIAN TUB | Ovarian disorder |
| 621 | POLYP OF CORPUS UTERI | Uterine disorder |
| 621.2 | HYPERTROPHY OF UTERUS | Uterine disorder |
| 621.3 | ENDOMETRIAL HYPERPLASIA UNSPECIFIED | Uterine disorder |
| 621.31 | SIMPLE ENDOMETRIAL HYPERPLASIA WITHOUT ATYPIA | Uterine disorder |
| 621.32 | COMPLEX ENDOMETRIAL HYPERPLASIA WITHOUT ATYPIA | Uterine disorder |
| 621.33 | ENDOMETRIAL HYPERPLASIA WITH ATYPIA | Uterine disorder |
| 621.4 | HEMATOMETRA | AUB |
| 621.6 | MALPOSITION OF UTERUS | Anatomic anomaly |
| 621.8 | OTHER SPECIFIED DISORDERS OF UTERUS, NOT ELSEWHERE CLASSIFIE | Uterine disorder |
| 621.9 | UNSPECIFIED DISORDER OF UTERUS | Uterine disorder |
| 622 | EROSION AND ECTROPION OF CERVIX | Cervical disorder |
| 622.1 | DYSPLASIA OF CERVIX, UNSPECIFIED | Cervical disorder |
| 622.11 | MILD DYSPLASIA OF CERVIX | Cervical disorder |
| 622.12 | MODERATE DYSPLASIA OF CERVIX | Cervical disorder |
| 622.4 | STRICTURE AND STENOSIS OF CERVIX | Cervical disorder |
| 622.7 | MUCOUS POLYP OF CERVIX | Cervical disorder |
| 622.8 | OTHER SPECIFIED NONINFLAMMATORY DISORDERS OF CERVIX | Cervical disorder |
| 623 | DYSPLASIA OF VAGINA | Vaginal disorder |
| 623.2 | STRICTURE OR ATRESIA OF VAGINA | Vaginal disorder |
| 623.8 | OTHER SPECIFIED NONINFLAMMATORY DISORDERS OF VAGINA | Vaginal disorder |
| 624.3 | HYPERTROPHY OF LABIA | Vulvar disorder |
| 625 | DYSPAREUNIA | Pelvic pain |
| 625.3 | DYSMENORRHEA | Pelvic pain |
| 625.5 | PELVIC CONGESTION SYNDROME | Pelvic pain |
| 625.6 | STRESS INCONTINENCE, FEMALE | Bladder disorder |
| 625.8 | OTHER SPECIFIED SYMPTOMS ASSOCIATED WITH FEMALE GENITAL ORGA | Other |
| 625.9 | UNSPECIFIED SYMPTOM ASSOCIATED WITH FEMALE GENITAL ORGANS | Other |
| 626.1 | SCANTY OR INFREQUENT MENSTRUATION | AUB |
| 626.2 | EXCESSIVE OR FREQUENT MENSTRUATION | AUB |
| 626.4 | IRREGULAR MENSTRUAL CYCLE | AUB |
| 626.6 | METRORRHAGIA | AUB |
| 626.7 | POSTCOITAL BLEEDING | AUB |
| 626.8 | OTHER DISORDERS OF MENSTRUATION AND OTHER ABNORMAL BLEEDING | AUB |
| 626.9 | UNSPECIFIED DISORDERS OF MENSTRUATION AND OTHER ABNORMAL BLE | AUB |
| 627 | PREMENOPAUSAL MENORRHAGIA | AUB |
| 627.1 | POSTMENOPAUSAL BLEEDING | AUB |
| 627.2 | SYMPTOMATIC MENOPAUSAL OR FEMALE CLIMACTERIC STATES | Other |
| 627.8 | OTHER SPECIFIED MENOPAUSAL AND POSTMENOPAUSAL DISORDERS | Other |
| 629.89 | OTHER SPECIFIED DISORDERS OF FEMALE GENITAL ORGANS | Other |
| 630 | HYDATIDIFORM MOLE | Other |
| 633.9 | UNSPECIFIED ECTOPIC PREGNANCY WITHOUT INTRAUTERINE PREGNANCY | Other |
| 639.9 | UNSPECIFIED COMPLICATION FOLLOWING ABORTION OR ECTOPIC AND M | Other |
| 730.28 | UNSPECIFIED OSTEOMYELITIS INVOLVING OTHER SPECIFIED SITES | Infection |
| 747.69 | ANOMALIES OF OTHER SPECIFIED SITES OF PERIPHERAL VASCULAR SY | Other |
| 752.11 | EMBRYONIC CYST OF FALLOPIAN TUBES AND BROAD LIGAMENTS | Mass |
| 752.2 | DOUBLING OF UTERUS | Anatomic anomaly |
| 752.41 | EMBRYONIC CYST OF CERVIX, VAGINA, AND EXTERNAL FEMALE GENITA | Mass |
| 752.47 | LONGITUDINAL VAGINAL SEPTUM | Anatomic anomaly |
| 786.5 | UNSPECIFIED CHEST PAIN | Other |
| 787.91 | DIARRHEA | Other |
| 788.2 | RETENTION OF URINE, UNSPECIFIED | Bladder disorder |
| 788.3 | UNSPECIFIED URINARY INCONTINENCE | Bladder disorder |
| 788.33 | MIXED INCONTINENCE, URGE AND STRESS (MALE)(FEMALE) | Bladder disorder |
| 788.5 | OLIGURIA AND ANURIA | Bladder disorder |
| 788.63 | URGENCY OF URINATION | Bladder disorder |
| 789 | ABDOMINAL PAIN, UNSPECIFIED SITE | Pelvic pain |
| 789.03 | ABDOMINAL PAIN, RIGHT LOWER QUADRANT | Pelvic pain |
| 789.04 | ABDOMINAL PAIN, LEFT LOWER QUADRANT | Pelvic pain |
| 789.3 | ABDOMINAL OR PELVIC SWELLING, MASS, OR LUMP, UNSPECIFIED SIT | Mass |
| 789.39 | ABDOMINAL OR PELVIC SWELLING, MASS, OR LUMP, OTHER SPECIFIED | Mass |
| 789.59 | OTHER ASCITES | Other |
| 793.5 | NONSPECIFIC ABNORMAL FINDINGS ON RADIOLOGICAL AND OTHER EXAM | Other |
| 793.99 | OTHER NONSPECIFIC (ABNORMAL) FINDINGS ON RADIOLOGICAL AND OT | Other |
| 795 | ABNORMAL GLANDULAR PAPANICOLAOU SMEAR OF CERVIX | Cervical disorder |
| 795.01 | PAPANICOLAOU SMEAR OF CERVIX WITH ATYPICAL SQUAMOUS CELL OF | Cervical disorder |
| 795.03 | PAPANICOLAOU SMEAR OF CERVIX WITH LOW GRADE SQUAMOUS INTERAE | Cervical disorder |
| 796.4 | OTHER ABNORMAL CLINICAL FINDINGS | Other |
| 867 | INJURY TO BLADDER AND URETHRA WITHOUT MENTION OF OPEN WOUND | Injury |
| 867.4 | INJURY TO UTERUS WITHOUT MENTION OF OPEN WOUND INTO CAVITY | Injury |
| 922.2 | CONTUSION OF ABDOMINAL WALL | Injury |
| 996.32 | MECHANICAL COMPLICATION DUE TO INTRAUTERINE CONTRACEPTIVE DE | Injury |
| 997.49 | OTHER DIGESTIVE SYSTEM COMPLICATIONS | Other |
| 998.2 | ACCIDENTAL PUNCTURE OR LACERATION DURING A PROCEDURE, NOT EL | Injury |
| 998.59 | OTHER POSTOPERATIVE INFECTION | Infection |
| 998.6 | PERSISTENT POSTOPERATIVE FISTULA, NOT ELSEWHERE CLASSIFIED | Anatomic anomaly |
| 998.89 | OTHER SPECIFIED COMPLICATIONS OF PROCEDURES NOT ELSEWHERE CL | Injury |
| C16.9 | MALIGNANT NEOPLASM OF STOMACH, UNSPECIFIED | Malignancy |
| C18.0 | MALIGNANT NEOPLASM OF CECUM | Malignancy |
| C18.1 | MALIGNANT NEOPLASM OF APPENDIX | Malignancy |
| C18.7 | MALIGNANT NEOPLASM OF SIGMOID COLON | Malignancy |
| C18.9 | MALIGNANT NEOPLASM OF COLON, UNSPECIFIED | Malignancy |
| C19 | MALIGNANT NEOPLASM OF RECTOSIGMOID JUNCTION | Malignancy |
| C20 | MALIGNANT NEOPLASM OF RECTUM | Malignancy |
| C21.8 | MALIG NEOPLASM OF OVRLP SITES OF RECTUM, ANUS AND ANAL CANAL | Malignancy |
| C25.9 | MALIGNANT NEOPLASM OF PANCREAS, UNSPECIFIED | Malignancy |
| C48.0 | MALIGNANT NEOPLASM OF RETROPERITONEUM | Malignancy |
| C48.1 | MALIGNANT NEOPLASM OF SPECIFIED PARTS OF PERITONEUM | Malignancy |
| C48.2 | MALIGNANT NEOPLASM OF PERITONEUM, UNSPECIFIED | Malignancy |
| C48.8 | MALIG NEOPLASM OF OVRLP SITES OF RETROPERITON AND PERITONEUM | Malignancy |
| C49.4 | MALIGNANT NEOPLASM OF CONNECTIVE AND SOFT TISSUE OF ABDOMEN | Malignancy |
| C49.5 | MALIGNANT NEOPLASM OF CONNECTIVE AND SOFT TISSUE OF PELVIS | Malignancy |
| C50.212 | MALIG NEOPLASM OF UPPER-INNER QUADRANT OF LEFT FEMALE BREAST | Malignancy |
| C50.311 | MALIG NEOPLM OF LOWER-INNER QUADRANT OF RIGHT FEMALE BREAST | Malignancy |
| C50.411 | MALIG NEOPLM OF UPPER-OUTER QUADRANT OF RIGHT FEMALE BREAST | Malignancy |
| C50.911 | MALIGNANT NEOPLASM OF UNSP SITE OF RIGHT FEMALE BREAST | Malignancy |
| C50.912 | MALIGNANT NEOPLASM OF UNSPECIFIED SITE OF LEFT FEMALE BREAST | Malignancy |
| C50.919 | MALIGNANT NEOPLASM OF UNSP SITE OF UNSPECIFIED FEMALE BREAST | Malignancy |
| C53.0 | MALIGNANT NEOPLASM OF ENDOCERVIX | Malignancy |
| C53.8 | MALIGNANT NEOPLASM OF OVERLAPPING SITES OF CERVIX UTERI | Malignancy |
| C53.9 | MALIGNANT NEOPLASM OF CERVIX UTERI, UNSPECIFIED | Malignancy |
| C54.0 | MALIGNANT NEOPLASM OF ISTHMUS UTERI | Malignancy |
| C54.1 | MALIGNANT NEOPLASM OF ENDOMETRIUM | Malignancy |
| C54.2 | MALIGNANT NEOPLASM OF MYOMETRIUM | Malignancy |
| C54.8 | MALIGNANT NEOPLASM OF OVERLAPPING SITES OF CORPUS UTERI | Malignancy |
| C54.9 | MALIGNANT NEOPLASM OF CORPUS UTERI, UNSPECIFIED | Malignancy |
| C55 | MALIGNANT NEOPLASM OF UTERUS, PART UNSPECIFIED | Malignancy |
| C56.1 | MALIGNANT NEOPLASM OF RIGHT OVARY | Malignancy |
| C56.2 | MALIGNANT NEOPLASM OF LEFT OVARY | Malignancy |
| C56.9 | MALIGNANT NEOPLASM OF UNSPECIFIED OVARY | Malignancy |
| C57.01 | MALIGNANT NEOPLASM OF RIGHT FALLOPIAN TUBE | Malignancy |
| C67.1 | MALIGNANT NEOPLASM OF DOME OF BLADDER | Malignancy |
| C67.3 | MALIGNANT NEOPLASM OF ANTERIOR WALL OF BLADDER | Malignancy |
| C67.9 | MALIGNANT NEOPLASM OF BLADDER, UNSPECIFIED | Malignancy |
| C77.0 | SEC AND UNSP MALIG NEOPLASM OF NODES OF HEAD, FACE AND NECK | Malignancy |
| C77.5 | SECONDARY AND UNSP MALIGNANT NEOPLASM OF INTRAPELV NODES | Malignancy |
| C78.6 | SECONDARY MALIGNANT NEOPLASM OF RETROPERITON AND PERITONEUM | Malignancy |
| C78.7 | SECONDARY MALIG NEOPLASM OF LIVER AND INTRAHEPATIC BILE DUCT | Malignancy |
| C79.01 | SECONDARY MALIGNANT NEOPLASM OF R KIDNEY AND RENAL PELVIS | Malignancy |
| C79.62 | SECONDARY MALIGNANT NEOPLASM OF LEFT OVARY | Malignancy |
| C7A.1 | MALIGNANT POORLY DIFFERENTIATED NEUROENDOCRINE TUMORS | Malignancy |
| C7B.04 | SECONDARY CARCINOID TUMORS OF PERITONEUM | Malignancy |
| C7B.8 | OTHER SECONDARY NEUROENDOCRINE TUMORS | Malignancy |
| C81.98 | HODGKIN LYMPHOMA, UNSPECIFIED, LYMPH NODES OF MULTIPLE SITES | Malignancy |
| D05.02 | LOBULAR CARCINOMA IN SITU OF LEFT BREAST | Malignancy |
| D05.12 | INTRADUCTAL CARCINOMA IN SITU OF LEFT BREAST | Malignancy |
| D06.0 | CARCINOMA IN SITU OF ENDOCERVIX | Malignancy |
| D06.9 | CARCINOMA IN SITU OF CERVIX, UNSPECIFIED | Malignancy |
| D07.1 | CARCINOMA IN SITU OF VULVA | Malignancy |
| D07.2 | CARCINOMA IN SITU OF VAGINA | Malignancy |
| D09.0 | CARCINOMA IN SITU OF BLADDER | Malignancy |
| D19.7 | BENIGN NEOPLASM OF MESOTHELIAL TISSUE OF OTHER SITES | Mass |
| D21.5 | BENIGN NEOPLASM OF CONNECTIVE AND OTH SOFT TISSUE OF PELVIS | Mass |
| D21.9 | BENIGN NEOPLASM OF CONNECTIVE AND OTHER SOFT TISSUE, UNSP | Mass |
| D25.0 | SUBMUCOUS LEIOMYOMA OF UTERUS | Leiomyoma |
| D25.1 | INTRAMURAL LEIOMYOMA OF UTERUS | Leiomyoma |
| D25.2 | SUBSEROSAL LEIOMYOMA OF UTERUS | Leiomyoma |
| D25.9 | LEIOMYOMA OF UTERUS, UNSPECIFIED | Leiomyoma |
| D26.0 | OTHER BENIGN NEOPLASM OF CERVIX UTERI | Cervical disorder |
| D26.1 | OTHER BENIGN NEOPLASM OF CORPUS UTERI | Mass |
| D26.9 | OTHER BENIGN NEOPLASM OF UTERUS, UNSPECIFIED | Mass |
| D27.0 | BENIGN NEOPLASM OF RIGHT OVARY | Mass |
| D27.1 | BENIGN NEOPLASM OF LEFT OVARY | Mass |
| D27.9 | BENIGN NEOPLASM OF UNSPECIFIED OVARY | Mass |
| D28.1 | BENIGN NEOPLASM OF VAGINA | Mass |
| D28.2 | BENIGN NEOPLASM OF UTERINE TUBES AND LIGAMENTS | Mass |
| D28.7 | BENIGN NEOPLASM OF OTHER SPECIFIED FEMALE GENITAL ORGANS | Mass |
| D35.00 | BENIGN NEOPLASM OF UNSPECIFIED ADRENAL GLAND | Mass |
| D37.6 | NEOPLASM OF UNCERTAIN BEHAVIOR OF LIVER, GB & BILE DUCT | Mass |
| D39.0 | NEOPLASM OF UNCERTAIN BEHAVIOR OF UTERUS | Mass |
| D39.10 | NEOPLASM OF UNCERTAIN BEHAVIOR OF UNSPECIFIED OVARY | Mass |
| D39.11 | NEOPLASM OF UNCERTAIN BEHAVIOR OF RIGHT OVARY | Mass |
| D39.12 | NEOPLASM OF UNCERTAIN BEHAVIOR OF LEFT OVARY | Mass |
| D39.8 | NEOPLASM OF UNCERTAIN BEHAVIOR OF OTH FEMALE GENITAL ORGANS | Mass |
| D48.1 | NEOPLASM OF UNCERTAIN BEHAVIOR OF CONNCTV/SOFT TISS | Mass |
| D49.89 | NEOPLASM OF UNSPECIFIED BEHAVIOR OF OTHER SPECIFIED SITES | Mass |
| D50.9 | IRON DEFICIENCY ANEMIA, UNSPECIFIED | Other |
| D64.9 | ANEMIA, UNSPECIFIED | Other |
| E21.0 | PRIMARY HYPERPARATHYROIDISM | Other |
| E28.310 | SYMPTOMATIC PREMATURE MENOPAUSE | Other |
| E66.01 | MORBID (SEVERE) OBESITY DUE TO EXCESS CALORIES | Other |
| G89.18 | OTHER ACUTE POSTPROCEDURAL PAIN | Pelvic pain |
| G89.29 | OTHER CHRONIC PAIN | Pelvic pain |
| G93.49 | OTHER ENCEPHALOPATHY | Other |
| H53.8 | OTHER VISUAL DISTURBANCES | Other |
| I07.1 | RHEUMATIC TRICUSPID INSUFFICIENCY | Other |
| I26.99 | OTHER PULMONARY EMBOLISM WITHOUT ACUTE COR PULMONALE | Other |
| I50.43 | ACUTE ON CHRONIC COMBINED SYSTOLIC AND DIASTOLIC HRT FAIL | Other |
| I95.89 | OTHER HYPOTENSION | Other |
| I97.620 | POSTPROC HEMOR OF A CIRC SYS ORG FOLLOWING OTHER PROCEDURE | Injury |
| J33.8 | OTHER POLYP OF SINUS | Other |
| K25.9 | GASTRIC ULCER, UNSP AS ACUTE OR CHRONIC, W/O HEMOR OR PERF | Other |
| K42.0 | UMBILICAL HERNIA WITH OBSTRUCTION, WITHOUT GANGRENE | Other |
| K42.9 | UMBILICAL HERNIA WITHOUT OBSTRUCTION OR GANGRENE | Other |
| K43.2 | INCISIONAL HERNIA WITHOUT OBSTRUCTION OR GANGRENE | Other |
| K43.9 | VENTRAL HERNIA WITHOUT OBSTRUCTION OR GANGRENE | Other |
| K50.10 | CROHN'S DISEASE OF LARGE INTESTINE WITHOUT COMPLICATIONS | Other |
| K50.113 | CROHN'S DISEASE OF LARGE INTESTINE WITH FISTULA | Anatomic anomaly |
| K52.9 | NONINFECTIVE GASTROENTERITIS AND COLITIS, UNSPECIFIED | Infection |
| K57.32 | DVTRCLI OF LG INT W/O PERFORATION OR ABSCESS W/O BLEEDING | Infection |
| K57.80 | DVTRCLI OF INTEST, PART UNSP, W PERF AND ABSCESS W/O BLEED | Infection |
| K59.00 | CONSTIPATION, UNSPECIFIED | Other |
| K62.3 | RECTAL PROLAPSE | Prolapse |
| K63.5 | POLYP OF COLON | Other |
| K74.69 | OTHER CIRRHOSIS OF LIVER | Other |
| K80.10 | CALCULUS OF GALLBLADDER W CHRONIC CHOLECYST W/O OBSTRUCTION | Other |
| K80.34 | CALCULUS OF BILE DUCT W CHRONIC CHOLANGITIS W/O OBSTRUCTION | Other |
| K81.1 | CHRONIC CHOLECYSTITIS | Infection |
| K91.850 | POUCHITIS | Infection |
| L85.9 | EPIDERMAL THICKENING, UNSPECIFIED | Other |
| L90.0 | LICHEN SCLEROSUS ET ATROPHICUS | Vulvar disorder |
| N18.4 | CHRONIC KIDNEY DISEASE, STAGE 4 (SEVERE) | Other |
| N18.6 | END STAGE RENAL DISEASE | Other |
| N30.90 | CYSTITIS, UNSPECIFIED WITHOUT HEMATURIA | Bladder disorder |
| N31.9 | NEUROMUSCULAR DYSFUNCTION OF BLADDER, UNSPECIFIED | Bladder disorder |
| N36.8 | OTHER SPECIFIED DISORDERS OF URETHRA | Bladder disorder |
| N39.0 | URINARY TRACT INFECTION, SITE NOT SPECIFIED | Bladder disorder |
| N39.3 | STRESS INCONTINENCE (FEMALE) (MALE) | Bladder disorder |
| N39.41 | URGE INCONTINENCE | Bladder disorder |
| N39.8 | OTHER SPECIFIED DISORDERS OF URINARY SYSTEM | Bladder disorder |
| N60.81 | OTHER BENIGN MAMMARY DYSPLASIAS OF RIGHT BREAST | Other |
| N65.1 | DISPROPORTION OF RECONSTRUCTED BREAST | Other |
| N70.11 | CHRONIC SALPINGITIS | Infection |
| N71.9 | INFLAMMATORY DISEASE OF UTERUS, UNSPECIFIED | Infection |
| N72 | INFLAMMATORY DISEASE OF CERVIX UTERI | Infection |
| N73.1 | CHRONIC PARAMETRITIS AND PELVIC CELLULITIS | Infection |
| N73.6 | FEMALE PELVIC PERITONEAL ADHESIONS (POSTINFECTIVE) | Anatomic anomaly |
| N73.9 | FEMALE PELVIC INFLAMMATORY DISEASE, UNSPECIFIED | Infection |
| N75.0 | CYST OF BARTHOLIN'S GLAND | Mass |
| N75.1 | ABSCESS OF BARTHOLIN'S GLAND | Infection |
| N76.1 | SUBACUTE AND CHRONIC VAGINITIS | Infection |
| N80.0 | ENDOMETRIOSIS OF UTERUS | Endometriosis |
| N80.1 | ENDOMETRIOSIS OF OVARY | Endometriosis |
| N80.2 | ENDOMETRIOSIS OF FALLOPIAN TUBE | Endometriosis |
| N80.3 | ENDOMETRIOSIS OF PELVIC PERITONEUM | Endometriosis |
| N80.4 | ENDOMETRIOSIS OF RECTOVAGINAL SEPTUM AND VAGINA | Endometriosis |
| N80.5 | ENDOMETRIOSIS OF INTESTINE | Endometriosis |
| N80.8 | OTHER ENDOMETRIOSIS | Endometriosis |
| N80.9 | ENDOMETRIOSIS, UNSPECIFIED | Endometriosis |
| N81.10 | CYSTOCELE, UNSPECIFIED | Prolapse |
| N81.2 | INCOMPLETE UTEROVAGINAL PROLAPSE | Prolapse |
| N81.3 | COMPLETE UTEROVAGINAL PROLAPSE | Prolapse |
| N81.4 | UTEROVAGINAL PROLAPSE, UNSPECIFIED | Prolapse |
| N81.5 | VAGINAL ENTEROCELE | Prolapse |
| N81.6 | RECTOCELE | Prolapse |
| N81.89 | OTHER FEMALE GENITAL PROLAPSE | Prolapse |
| N81.9 | FEMALE GENITAL PROLAPSE, UNSPECIFIED | Prolapse |
| N82.3 | FISTULA OF VAGINA TO LARGE INTESTINE | Fistula |
| N83.01 | FOLLICULAR CYST OF RIGHT OVARY | Mass |
| N83.11 | CORPUS LUTEUM CYST OF RIGHT OVARY | Mass |
| N83.20 | UNSPECIFIED OVARIAN CYSTS | Mass |
| N83.201 | UNSPECIFIED OVARIAN CYST, RIGHT SIDE | Mass |
| N83.202 | UNSPECIFIED OVARIAN CYST, LEFT SIDE | Mass |
| N83.29 | OTHER OVARIAN CYSTS | Mass |
| N83.291 | OTHER OVARIAN CYST, RIGHT SIDE | Mass |
| N83.292 | OTHER OVARIAN CYST, LEFT SIDE | Mass |
| N83.31 | ACQUIRED ATROPHY OF OVARY | Ovarian disorder |
| N83.8 | OTH NONINFLAMMATORY DISORD OF OVARY, FALLOP AND BROAD LIGMT | Ovarian disorder |
| N84.0 | POLYP OF CORPUS UTERI | Uterine disorder |
| N84.1 | POLYP OF CERVIX UTERI | Cervical disorder |
| N84.2 | POLYP OF VAGINA | Vaginal disorder |
| N85.00 | ENDOMETRIAL HYPERPLASIA, UNSPECIFIED | Uterine disorder |
| N85.01 | BENIGN ENDOMETRIAL HYPERPLASIA | Uterine disorder |
| N85.02 | ENDOMETRIAL INTRAEPITHELIAL NEOPLASIA ÝEIN¨ | Uterine disorder |
| N85.2 | HYPERTROPHY OF UTERUS | Uterine disorder |
| N85.4 | MALPOSITION OF UTERUS | Anatomic anomaly |
| N85.6 | INTRAUTERINE SYNECHIAE | Anatomic anomaly |
| N85.7 | HEMATOMETRA | AUB |
| N85.8 | OTHER SPECIFIED NONINFLAMMATORY DISORDERS OF UTERUS | Other |
| N85.9 | NONINFLAMMATORY DISORDER OF UTERUS, UNSPECIFIED | Other |
| N87.0 | MILD CERVICAL DYSPLASIA | Cervical disorder |
| N87.1 | MODERATE CERVICAL DYSPLASIA | Cervical disorder |
| N87.9 | DYSPLASIA OF CERVIX UTERI, UNSPECIFIED | Cervical disorder |
| N88.0 | LEUKOPLAKIA OF CERVIX UTERI | Cervical disorder |
| N88.2 | STRICTURE AND STENOSIS OF CERVIX UTERI | Cervical disorder |
| N88.8 | OTHER SPECIFIED NONINFLAMMATORY DISORDERS OF CERVIX UTERI | Cervical disorder |
| N89.8 | OTHER SPECIFIED NONINFLAMMATORY DISORDERS OF VAGINA | Vaginal disorder |
| N90.4 | LEUKOPLAKIA OF VULVA | Vulvar disorder |
| N90.6 | HYPERTROPHY OF VULVA | Vulvar disorder |
| N90.7 | VULVAR CYST | Vulvar disorder |
| N92.0 | EXCESSIVE AND FREQUENT MENSTRUATION WITH REGULAR CYCLE | AUB |
| N92.1 | EXCESSIVE AND FREQUENT MENSTRUATION WITH IRREGULAR CYCLE | AUB |
| N92.4 | EXCESSIVE BLEEDING IN THE PREMENOPAUSAL PERIOD | AUB |
| N92.6 | IRREGULAR MENSTRUATION, UNSPECIFIED | AUB |
| N93.0 | POSTCOITAL AND CONTACT BLEEDING | AUB |
| N93.8 | OTHER SPECIFIED ABNORMAL UTERINE AND VAGINAL BLEEDING | AUB |
| N93.9 | ABNORMAL UTERINE AND VAGINAL BLEEDING, UNSPECIFIED | AUB |
| N94.10 | UNSPECIFIED DYSPAREUNIA | Pelvic pain |
| N94.6 | DYSMENORRHEA, UNSPECIFIED | Pelvic pain |
| N94.89 | OTH COND ASSOC W FEMALE GENITAL ORGANS AND MENSTRUAL CYCLE | AUB |
| N95.0 | POSTMENOPAUSAL BLEEDING | AUB |
| N95.8 | OTHER SPECIFIED MENOPAUSAL AND PERIMENOPAUSAL DISORDERS | Other |
| N95.9 | UNSPECIFIED MENOPAUSAL AND PERIMENOPAUSAL DISORDER | Other |
| N97.1 | FEMALE INFERTILITY OF TUBAL ORIGIN | Other |
| N97.9 | FEMALE INFERTILITY, UNSPECIFIED | Other |
| N99.4 | POSTPROCEDURAL PELVIC PERITONEAL ADHESIONS | Anatomic anomaly |
| N99.820 | POSTPROC HEMOR OF A GU SYS ORG FOLLOWING A GU SYS PROCEDURE | Injury |
| O03.9 | COMPLETE OR UNSP SPONTANEOUS ABORTION WITHOUT COMPLICATION | Pregnancy-related |
| O73.1 | RETAINED PORTIONS OF PLACENTA AND MEMBRANES, W/O HEMORRHAGE | Pregnancy-related |
| Q51.10 | DOUBLING OF UTERUS W DOUBLING OF CERVIX AND VAGINA W/O OBST | Anatomic anomaly |
| Q51.2 | OTHER DOUBLING OF UTERUS | Anatomic anomaly |
| Q51.818 | OTHER CONGENITAL MALFORMATIONS OF UTERUS | Anatomic anomaly |
| Q52.11 | TRANSVERSE VAGINAL SEPTUM | Anatomic anomaly |
| Q85.8 | OTHER PHAKOMATOSES, NOT ELSEWHERE CLASSIFIED | Other |
| R05 | COUGH | Other |
| R10.2 | PELVIC AND PERINEAL PAIN | Pelvic pain |
| R10.84 | GENERALIZED ABDOMINAL PAIN | Pelvic pain |
| R19.00 | INTRA-ABD AND PELVIC SWELLING, MASS AND LUMP, UNSP SITE | Mass |
| R19.04 | LEFT LOWER QUADRANT ABDOMINAL SWELLING, MASS AND LUMP | Mass |
| R19.09 | OTHER INTRA-ABDOMINAL AND PELVIC SWELLING, MASS AND LUMP | Mass |
| R19.7 | DIARRHEA, UNSPECIFIED | Other |
| R23.2 | FLUSHING | Other |
| R25.2 | CRAMP AND SPASM | Pelvic pain |
| R39.9 | UNSP SYMPTOMS AND SIGNS INVOLVING THE GENITOURINARY SYSTEM | Other |
| R55 | SYNCOPE AND COLLAPSE | Other |
| R56.9 | UNSPECIFIED CONVULSIONS | Other |
| R87.612 | LOW GRADE INTREPITH LESION CYTO SMR CRVX (LGSIL) | Cervical disorder |
| R87.613 | HIGH GRADE INTREPITH LESION CYTO SMR CRVX (HGSIL) | Cervical disorder |
| R87.618 | OTH ABNORMAL CYTOLOG FINDINGS ON SPECIMENS FROM CERVIX UTERI | Cervical disorder |
| R87.619 | UNSP ABNORMAL CYTOLOG FINDINGS IN SPECMN FROM CERVIX UTERI | Cervical disorder |
| R87.623 | HIGH GRADE INTREPITH LESION CYTO SMR VAGN (HGSIL) | Vaginal disorder |
| R87.629 | UNSP ABNORMAL CYTOLOGICAL FINDINGS IN SPECIMENS FROM VAGINA | Vaginal disorder |
| R87.810 | CERVICAL HIGH RISK HPV DNA TEST POSITIVE | Cervical disorder |
| R93.5 | ABN FINDINGS ON DX IMAGING OF ABD REGIONS, INC RETROPERITON | Other |
| R93.8 | ABNORMAL FINDINGS ON DIAGNOSTIC IMAGING OF BODY STRUCTURES | Other |
| R94.39 | ABNORMAL RESULT OF OTHER CARDIOVASCULAR FUNCTION STUDY | Other |
| R97.8 | OTHER ABNORMAL TUMOR MARKERS | Other |
| T38.5X5A | ADVERSE EFFECT OF OTH ESTROGENS AND PROGESTOGENS, INIT | Other |
| T80.211A | BLOODSTREAM INFECTION DUE TO CENTRAL VENOUS CATHETER, INIT | Infection |
| T81.4XXA | INFECTION FOLLOWING A PROCEDURE, INITIAL ENCOUNTER | Infection |
| T83.32XA | DISPLACEMENT OF INTRAUTERINE CONTRACEPTIVE DEVICE, INIT | Injury |
| T83.39XA | MECH COMPL OF INTRAUTERINE CONTRACEPTIVE DEVICE, INIT ENCNTR | Injury |
| T83.711A | EROSN IMPLNT VAGINAL MESH TO SURRND ORG/TISS, INIT | Injury |
| T83.84XA | PAIN DUE TO GENITOURINARY PROSTH DEV/GRFT, INITIAL ENCOUNTER | Pelvic pain |
| T85.49XA | MECH COMPL OF BREAST PROSTHESIS AND IMPLANT, INIT ENCNTR | Other |
| V07.8 | NEED FOR OTHER SPECIFIED PROPHYLACTIC OR TREATMENT MEASURE | Other |
| V10.3 | PERSONAL HISTORY OF MALIGNANT NEOPLASM OF BREAST | Risk reduction |
| V12.72 | PERSONAL HISTORY OF COLONIC POLYPS | Other |
| V13.22 | PERSONAL HISTORY OF CERVICAL DYPLASIA | Cervical disorder |
| V16.41 | FAMILY HISTORY OF MALIGNANT NEOPLASM OF OVARY | Risk reduction |
| V25.11 | ENCOUNTER FOR INSERTION OF INTRAUTERINE CONTRACEPTIVE DEVICE | Other |
| V25.12 | ENCOUNTER FOR REMOVAL OF INTRAUTERINE CONTRACEPTIVE DEVICE | Other |
| V25.13 | ENCOUNTER FOR REMOVAL AND REINSERTION OF INTRAUTERINE CONTRA | Other |
| V25.2 | STERILIZATION | Other |
| V45.51 | PRESENCE OF INTRAUTERINE CONTRACEPTIVE DEVICE | Other |
| V45.71 | ACQUIRED ABSENCE OF BREAST AND NIPPLE | Other |
| V50.1 | OTHER PLASTIC SURGERY FOR UNACCEPTABLE COSMETIC APPEARANCE | Other |
| V50.41 | PROPHYLACTIC BREAST REMOVAL | Risk reduction |
| V50.42 | PROPHYLACTIC OVARY REMOVAL | Risk reduction |
| V50.49 | OTHER PROPHYLACTIC ORGAN REMOVAL | Risk reduction |
| V51.0 | ENCOUNTER FOR BREAST RECONSTRUCTION FOLLOWING MASTECTOMY | Risk reduction |
| V53.31 | FITTING AND ADJUSTMENT OF CARDIAC PACEMAKER | Other |
| V58.49 | OTHER SPECIFIED AFTERCARE FOLLOWING SURGERY | Other |
| V58.81 | FITTING AND ADJUSTMENT OF VASCULAR CATHETER | Other |
| V68.9 | ENCOUNTERS FOR UNSPECIFIED ADMINISTRATIVE PURPOSE | Other |
| V72.81 | PRE-OPERATIVE CARDIOVASCULAR EXAMINATION | Other |
| V72.83 | OTHER SPECIFIED PRE-OPERATIVE EXAMINATION | Other |
| V83.89 | OTHER GENETIC CARRIER STATUS | Risk reduction |
| V84.09 | GENETIC SUSCEPTIBILITY TO OTHER MALIGNANT NEOPLASM | Risk reduction |
| Z00.00 | ENCNTR FOR GENERAL ADULT MEDICAL EXAM W/O ABNORMAL FINDINGS | Other |
| Z01.810 | ENCOUNTER FOR PREPROCEDURAL CARDIOVASCULAR EXAMINATION | Other |
| Z01.818 | ENCOUNTER FOR OTHER PREPROCEDURAL EXAMINATION | Other |
| Z01.83 | ENCOUNTER FOR BLOOD TYPING | Other |
| Z02.9 | ENCOUNTER FOR ADMINISTRATIVE EXAMINATIONS, UNSPECIFIED | Other |
| Z08 | ENCNTR FOR FOLLOW-UP EXAM AFTER TRTMT FOR MALIGNANT NEOPLASM | Malignancy |
| Z12.4 | ENCOUNTER FOR SCREENING FOR MALIGNANT NEOPLASM OF CERVIX | Cervical disorder |
| Z14.8 | GENETIC CARRIER OF OTHER DISEASE | Risk reduction |
| Z15.01 | GENETIC SUSCEPTIBILITY TO MALIGNANT NEOPLASM OF BREAST | Risk reduction |
| Z15.09 | GENETIC SUSCEPTIBILITY TO OTHER MALIGNANT NEOPLASM | Risk reduction |
| Z29.8 | ENCOUNTER FOR OTHER SPECIFIED PROPHYLACTIC MEASURES | Risk reduction |
| Z30.2 | ENCOUNTER FOR STERILIZATION | Other |
| Z30.430 | ENCOUNTER FOR INSERTION OF INTRAUTERINE CONTRACEPTIVE DEVICE | Other |
| Z30.432 | ENCOUNTER FOR REMOVAL OF INTRAUTERINE CONTRACEPTIVE DEVICE | Other |
| Z30.433 | ENCNTR FOR REMOVAL AND REINSERTION OF UTERIN CONTRACEP DEV | Other |
| Z40.01 | ENCOUNTER FOR PROPHYLACTIC REMOVAL OF BREAST | Risk reduction |
| Z40.02 | ENCOUNTER FOR PROPHYLACTIC REMOVAL OF OVARY(S) | Risk reduction |
| Z40.09 | ENCOUNTER FOR PROPHYLACTIC REMOVAL OF OTHER ORGAN | Risk reduction |
| Z41.1 | ENCOUNTER FOR COSMETIC SURGERY | Other |
| Z42.1 | ENCOUNTER FOR BREAST RECONSTRUCTION FOLLOWING MASTECTOMY | Risk reduction |
| Z43.3 | ENCOUNTER FOR ATTENTION TO COLOSTOMY | Other |
| Z45.811 | ENCOUNTER FOR ADJUSTMENT OR REMOVAL OF RIGHT BREAST IMPLANT | Other |
| Z51.0 | ENCOUNTER FOR ANTINEOPLASTIC RADIATION THERAPY | Malignancy |
| Z80.3 | FAMILY HISTORY OF MALIGNANT NEOPLASM OF BREAST | Risk reduction |
| Z80.41 | FAMILY HISTORY OF MALIGNANT NEOPLASM OF OVARY | Risk reduction |
| Z85.3 | PERSONAL HISTORY OF MALIGNANT NEOPLASM OF BREAST | Risk reduction |
| Z87.410 | PERSONAL HISTORY OF CERVICAL DYSPLASIA | Cervical disorder |
| Z87.42 | PERSONAL HISTORY OF OTH DISEASES OF THE FEMALE GENITAL TRACT | Other |
| Z94.2 | LUNG TRANSPLANT STATUS | Other |
| Z97.5 | PRESENCE OF (INTRAUTERINE) CONTRACEPTIVE DEVICE | Other |
